# Supplementary material
Source: PubMed Central journal article supplement (PMC5084883)

Supplemental Figure 1

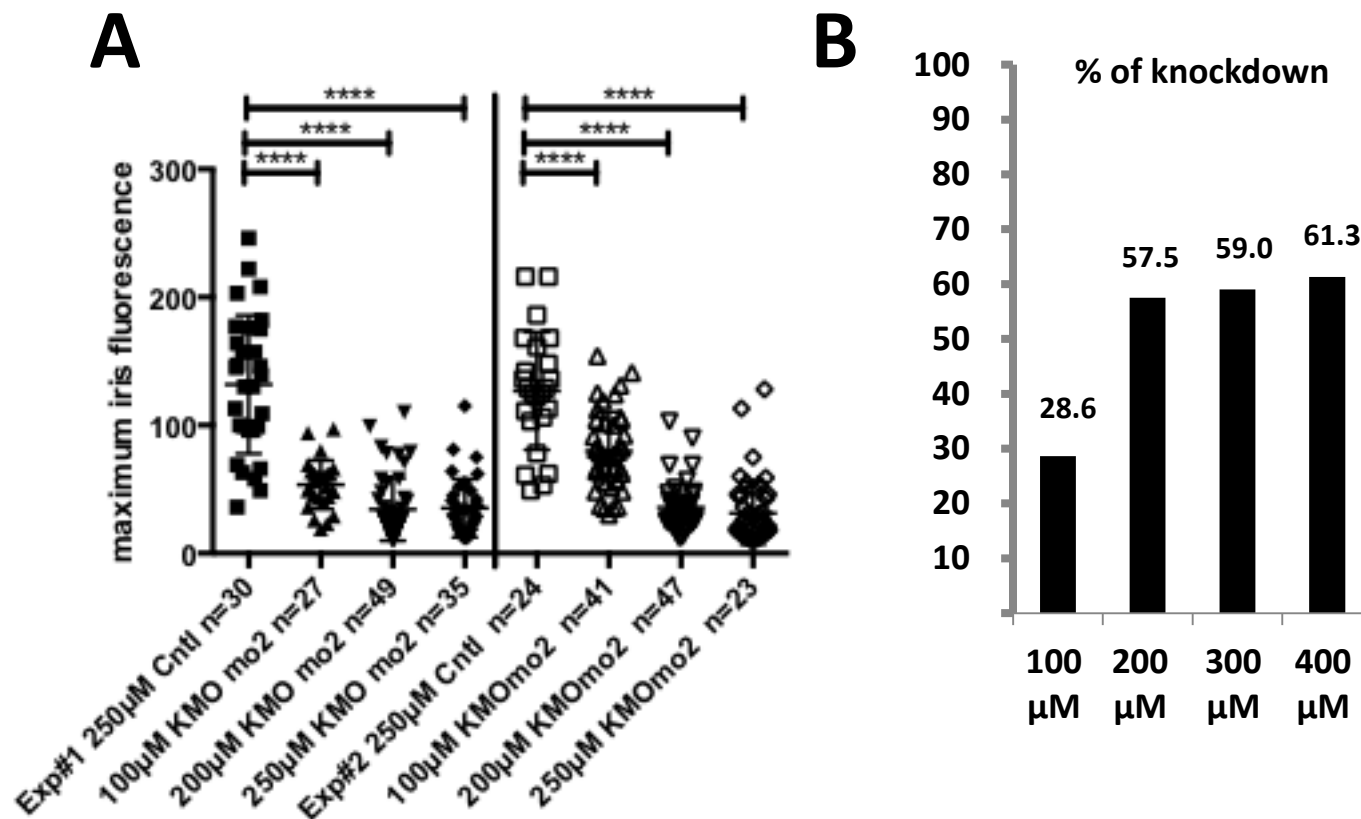

Supplement: ASN.2015070835SupplementaryData.pdf [file ASN.2015070835SupplementaryData.pdf]
